# Supplementary material
Source: publisher figshare collection journal article supplement (https://acs.figshare.com/ndownloader/files/4217188)
Supplement: Supplementary file 1 [file 4217188]

# Molecular dynamics simulations of surface oxidation on Pt and Pt/PtCo/Pt<sub>3</sub>Co supported nanoparticles over carbon

Rafael Callejas-Tovar<sup>1</sup>, Wenta Liao<sup>1</sup>, Hilda Mera<sup>1</sup>, and Perla B. Balbuena<sup>1,2\*</sup>

<sup>1</sup>Artie McFerrin Department of Chemical Engineering and <sup>2</sup>Materials Science and Engineering

Program, Texas A&M University, College Station, TX 77843

\*e-mail: balbuena@tamu.edu

## SUPPORTING INFORMATION

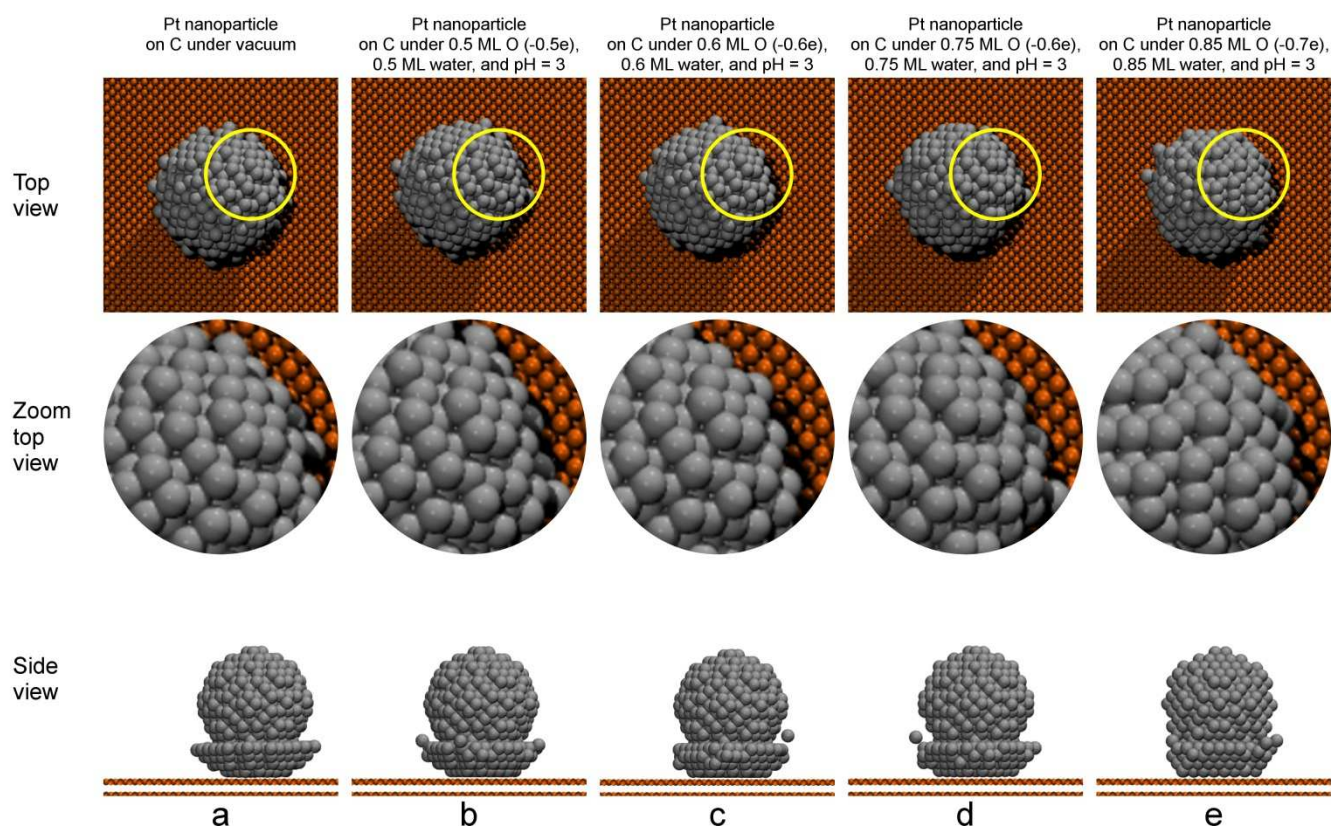

Figure SI-1. Snapshots of the core and non-charged surface atoms forming the supported Pt nanoparticle on C under vacuum (a) and different coverages of oxygen and water (b-e) taken at the end of the simulation using the CF1 model and under pH = 3. Color key: platinum-grey, carbon-orange.

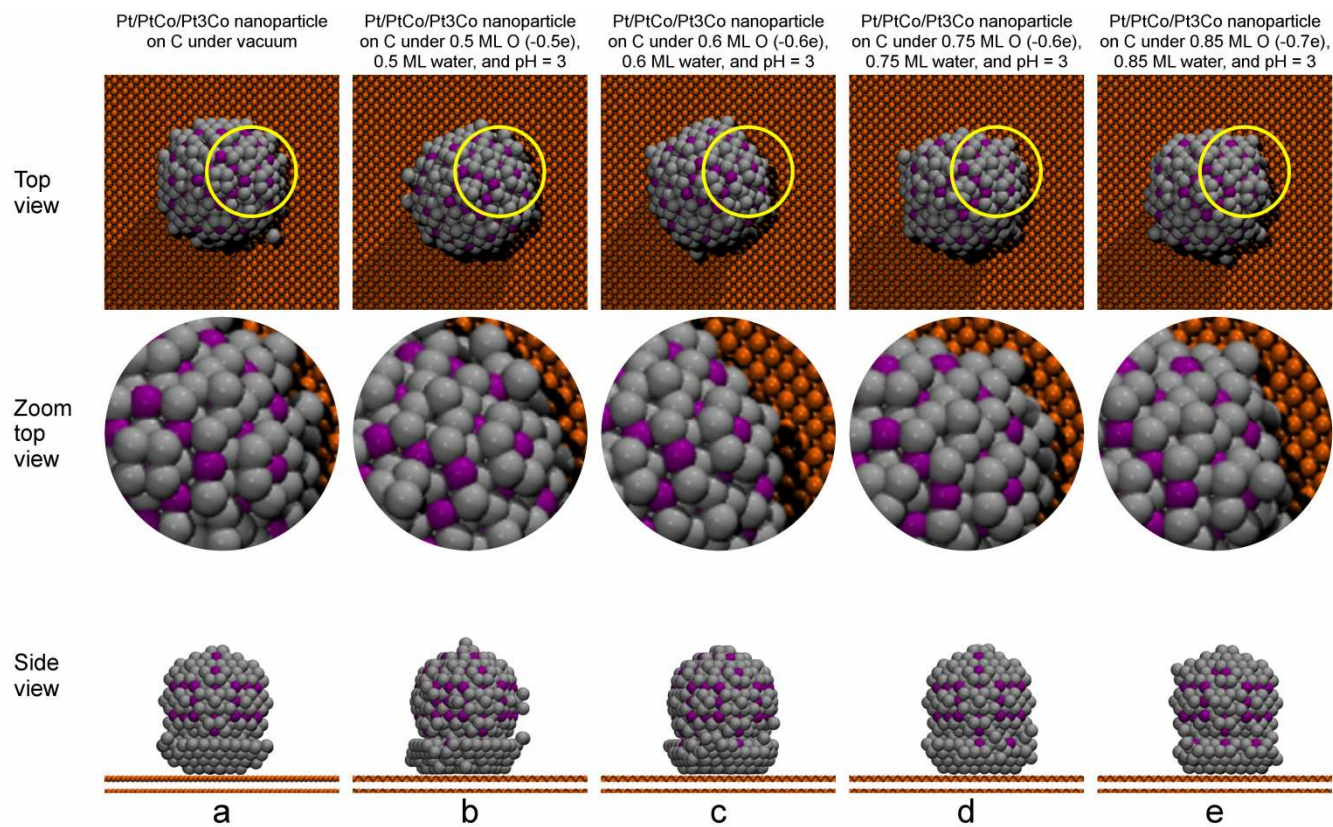

Figure SI-2. Snapshots of the core and non-charged surface atoms forming the supported Pt/PtCo/Pt3Co nanoparticle on C under vacuum (a) and different coverages of oxygen and water (b-e) taken at the end of the simulation using the CF1 model and under pH =3. Color key: platinum-grey, cobalt-purple, carbon-orange.



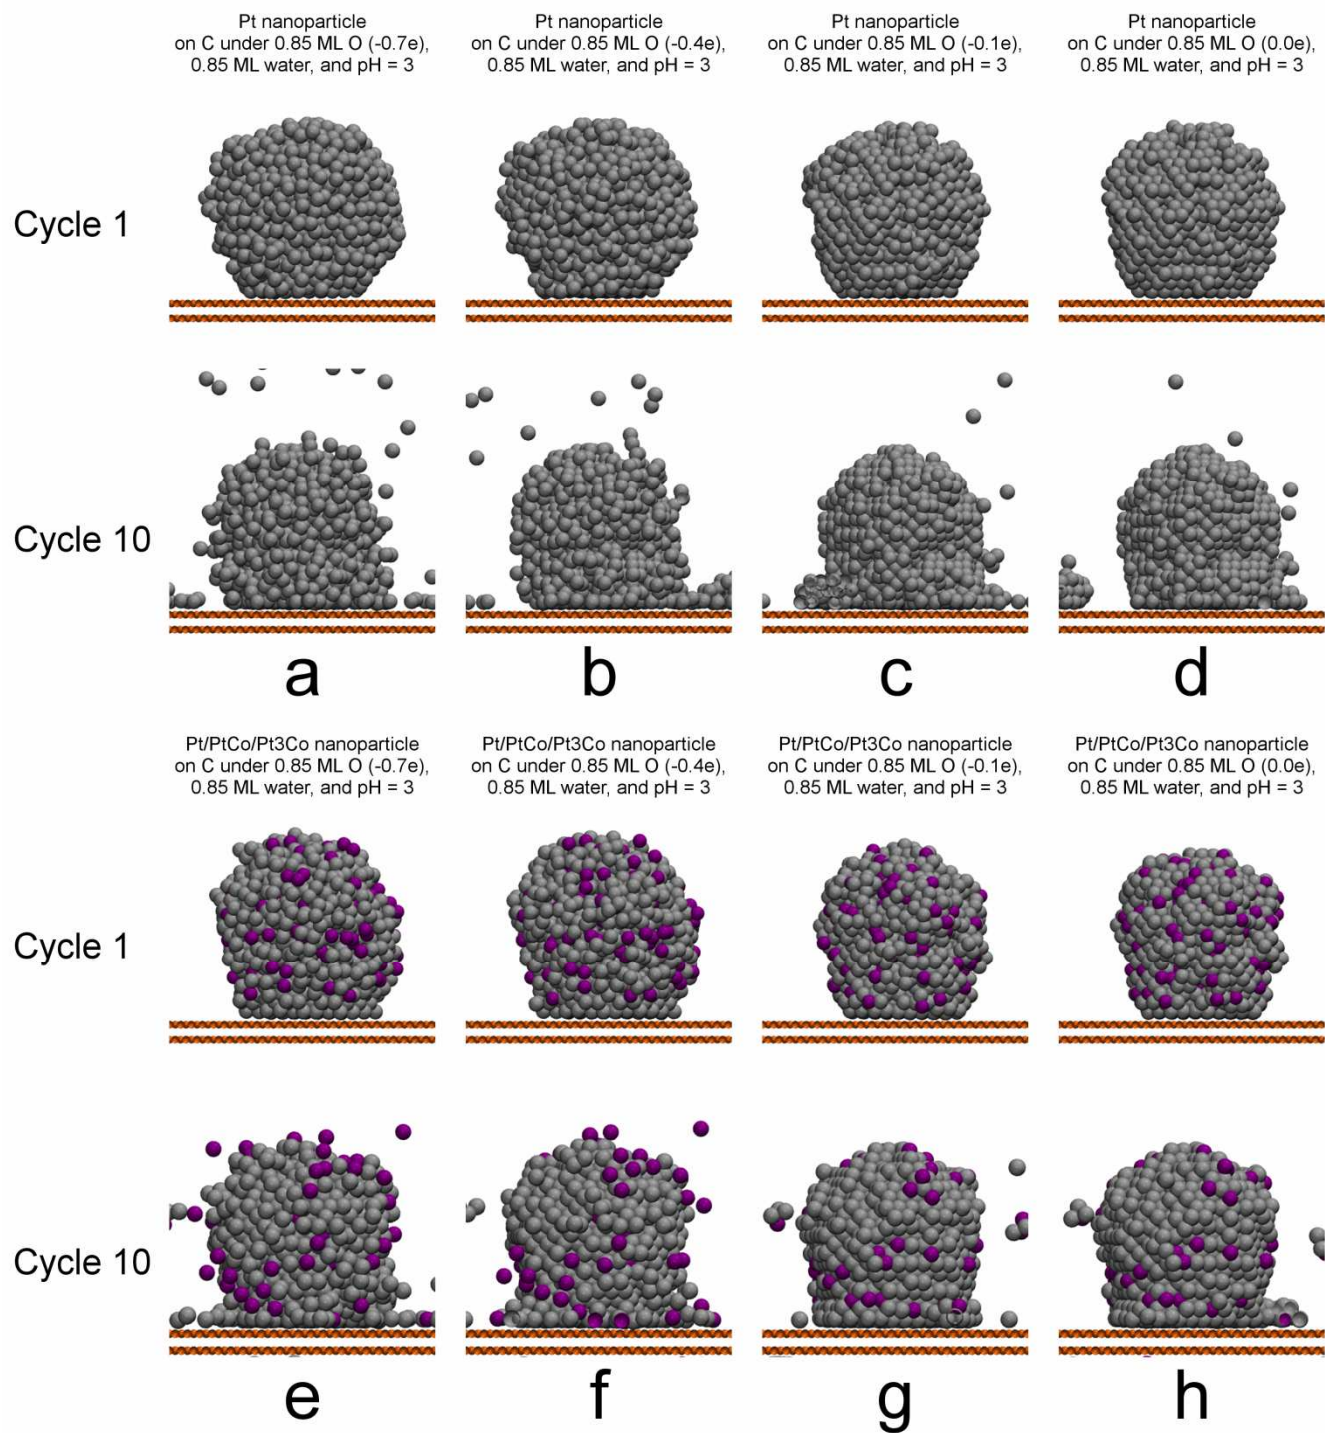

Figure SI-3. Snapshots of the supported Pt(a-d) and Pt/PtCo/Pt3Co(e-h) nanoparticles on C under 0.85 ML of oxygen and water, and pH = 3 taken at the end of the simulation after 1 and 10 reduction-oxidation cycles. All the adsorbates are hidden. Color key: platinum-grey, cobalt-purple, carbon-orange.



Pt nanoparticle on C under  
0.85 ML O ( $-0.7e$ ), 0.85 ML water, and pH = 3

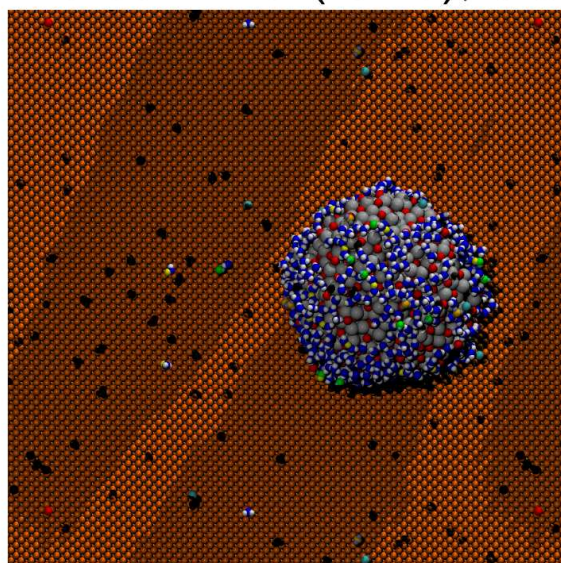

cycle 1

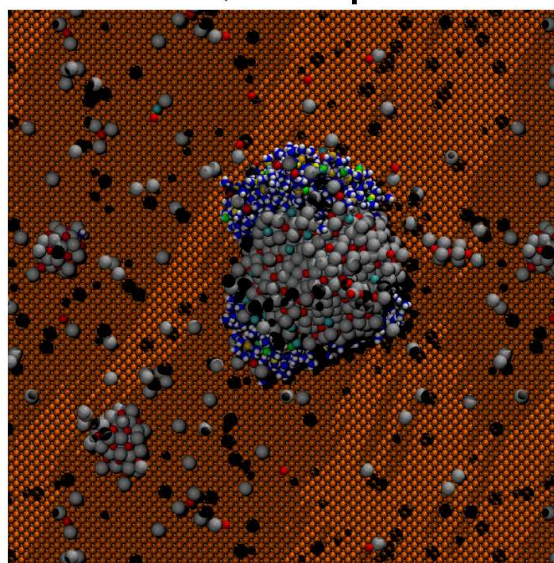

cycle 10

Pt/PtCo/Pt3Co nanoparticle on C under  
0.85 ML O ( $-0.7e$ ), 0.85 ML water, and pH = 3

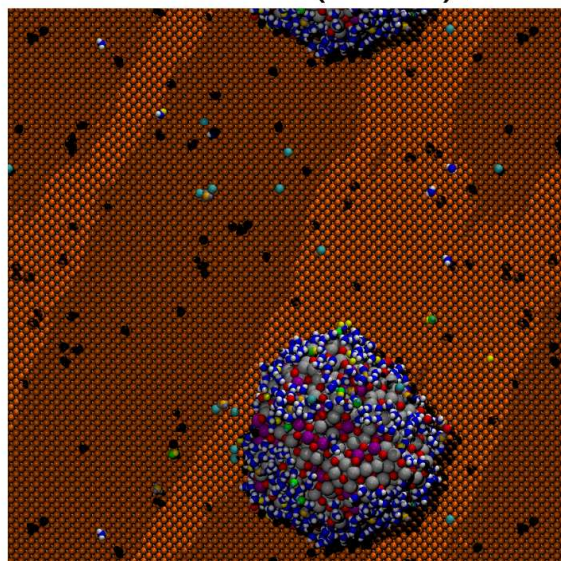

cycle 1

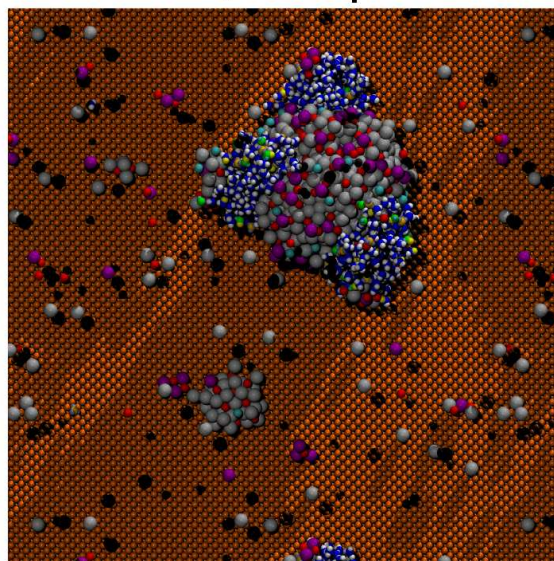

cycle 10

Figure SI-4. Snapshots of the supported Pt (top row) and Pt/PtCo/Pt3Co (bottom row) nanoparticles on C under 0.85 ML of oxygen and water, and pH = 3 taken at the end of the simulation after 1 and 10 reduction-oxidation cycles. Color key: platinum-grey, cobalt-purple, oxygen-red, cation-yellow, OH-green, H<sub>2</sub>O-blue and white, H<sub>3</sub>O-orange and purple, anion-cyan, carbon-orange.



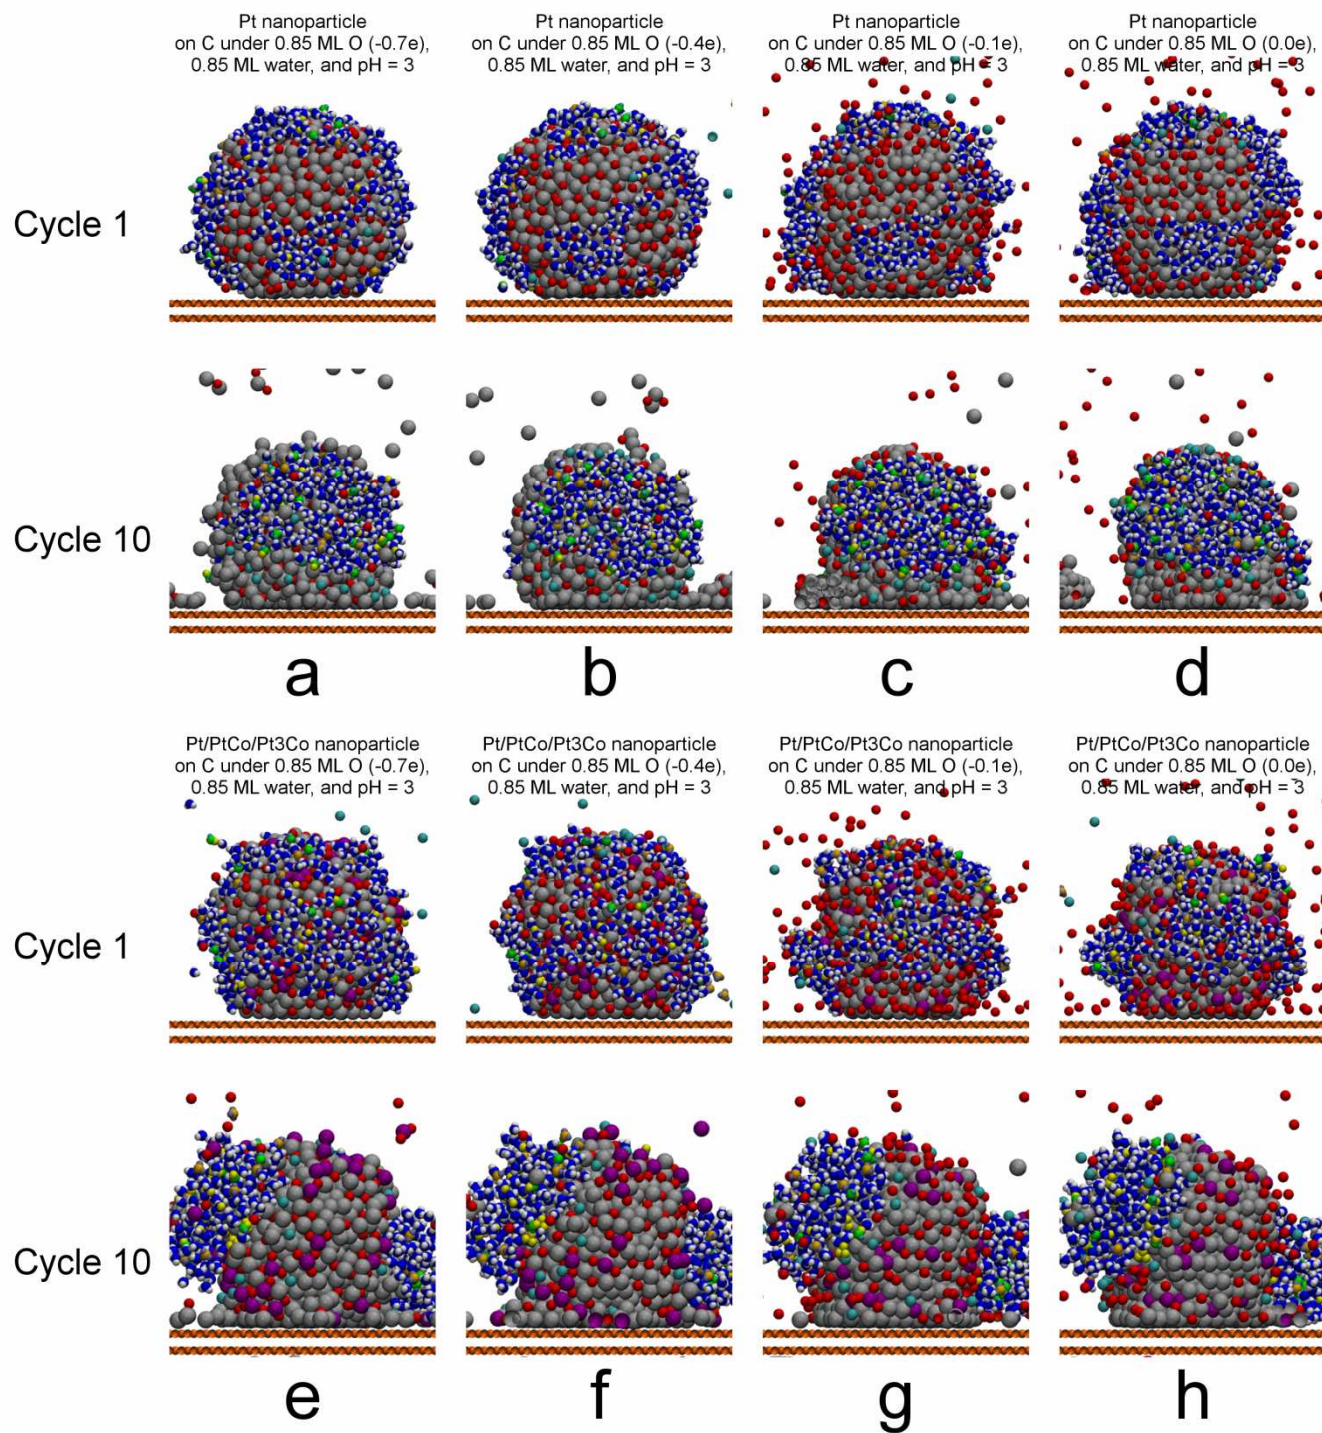

Figure SI-5. Snapshots of the supported Pt(a-d) and Pt/PtCo/Pt3Co(e-h) nanoparticles on C under 0.85 ML of oxygen and water, and pH = 3 taken at the end of the simulation after 1 and 10 reduction-oxidation cycles. Color key: platinum-grey, cobalt-purple, oxygen-red, cation-yellow, OH-green, H<sub>2</sub>O-blue and white, H<sub>3</sub>O-orange and purple, anion-cyan, carbon-orange.

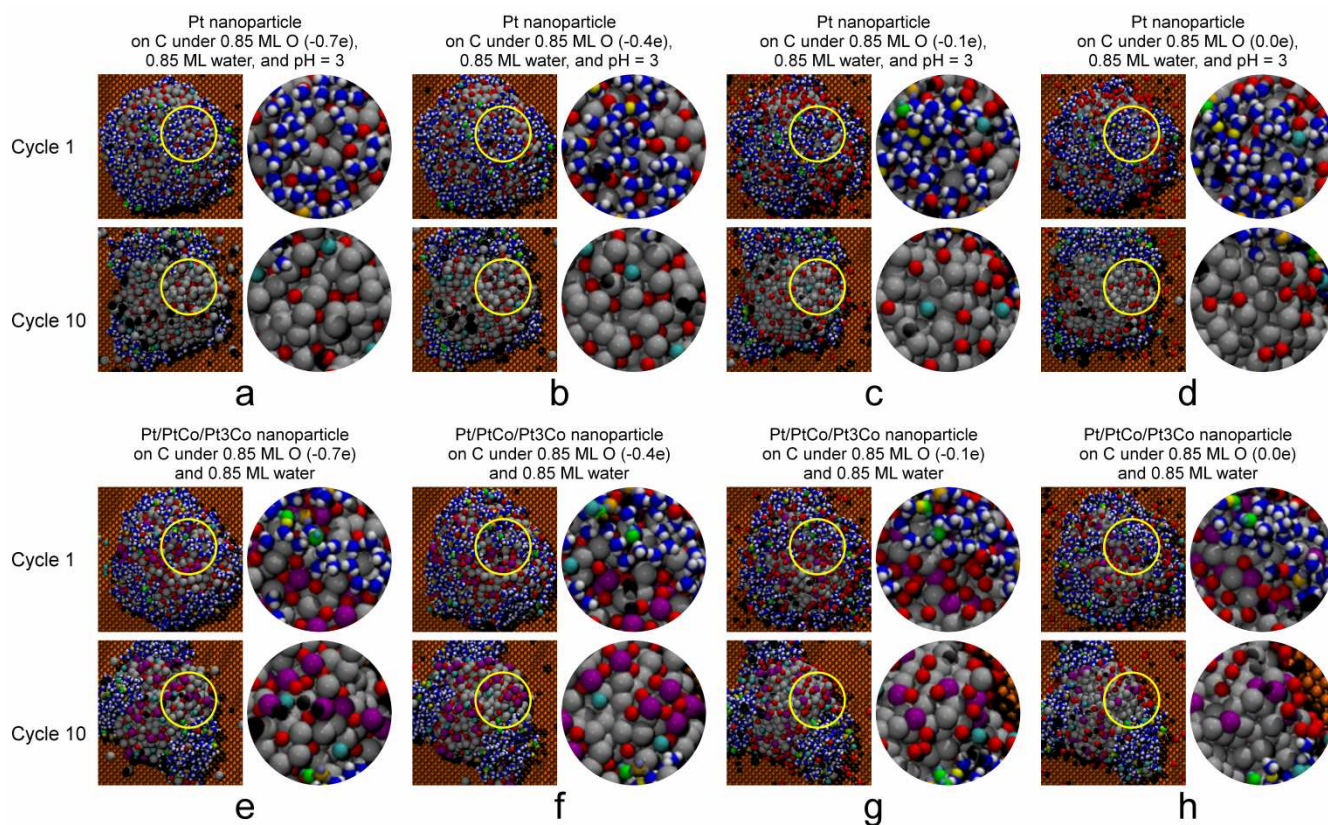

Figure SI-6. Snapshots of the supported Pt(a-d) and Pt/PtCo/Pt3Co(e-h) nanoparticles on C under 0.85 ML of oxygen and water, and pH = 3 taken at the end of the simulation after 1 and 10 reduction-oxidation cycles. Color key: platinum-grey, cobalt-purple, oxygen-red, cation-yellow, OH-green, H<sub>2</sub>O-blue and white, H<sub>3</sub>O-orange and purple, anion-cyan, carbon-orange.
